# Supplementary material
Source: ML conference proceedings conference paper supplement (https://openaccess.thecvf.com/content/ICCV2025/html/Wu_Federated_Domain_Generalization_ICCV_2025_paper.html)
Supplement: Supplementary file 1 [file Wu_Federated_Domain_Generalization_ICCV_2025_supplemental.pdf]

## Supplementary material for FedDSPG

To further validate the effectiveness of the proposed two-stage training strategy and conduct an in-depth analysis of the applicability of different generative modeling approaches in the context of Federated Domain Generalization (FDG), we supplement the following experiments.

### .1. Two-Stage vs. End-to-End Training

Although the proposed two-stage pipeline introduces a marginal increase in engineering complexity compared with end-to-end training, it significantly improves both performance and interpretability by decoupling optimization objectives. To quantify this benefit, we design an end-to-end baseline (**Ours-end2end**) that replaces the first-stage fine-tuned domain-specific prompts (DSPs) with randomly-initialized soft prompts. Results in Table 1 show consistent accuracy drops across the three datasets and roughly 43% longer convergence iterations (286 vs. 200), validating the necessity of stage-wise optimization.

### .2. Generative Backbone Choice: GAN vs. Diffusion

Federated learning imposes strict constraints on model size and communication. We therefore adopt a lightweight GAN (FedDSPG). To quantify the trade-off, we implement a diffusion variant (**Ours-diffusion**) based on DDPM with a compressed 10-step schedule. Table 1 reveals that while diffusion marginally improves accuracy (*e.g.*, +0.06% on *Office*), it demands  $3.5\times$  more communication rounds and  $5\times$  higher compute per forward pass, rendering it impractical for FL deployment.

| Dataset        | Office | DomainNet | PACS  | Iterations |
|----------------|--------|-----------|-------|------------|
| Ours-end2end   | 80.88  | 67.21     | 96.62 | 286        |
| Ours-diffusion | 85.42  | 75.72     | 97.55 | <b>700</b> |
| FedDSPG        | 85.36  | 75.64     | 97.43 | 200        |

Table 1. Accuracies (%) of the Ours-end2end method and Ours-diffusion and FedDSPG on three datasets (the data above are the average values of all domains) and the training iterations required for convergence.

### References

- [1] Jonathan Ho, Ajay Jain, and Pieter Abbeel. Denoising diffusion probabilistic models. *Advances in Neural Information Processing Systems*, 33:6840–6851, 2020.
